# Supplementary material
Source: HighWire-hosted journal article supplement (https://erj.ersjournals.com/content/60/4/2102635)
Supplement: inline-supplementary-material-2 [file inline-supplementary-material-2.pdf]

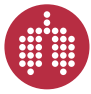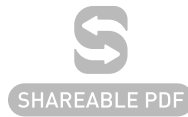

# Stimulation of the EP<sub>3</sub> receptor causes lung oedema by activation of TRPC6 in pulmonary endothelial cells

Tian Jiang<sup>1,2</sup>, Rudi Samapati<sup>1</sup>, Sergej Klassen<sup>3</sup>, Disi Lei<sup>1</sup>, Lasti Erfinanda<sup>1</sup>, Vera Jankowski<sup>4</sup>, Szandor Simmons<sup>1</sup>, Jun Yin<sup>2</sup>, Christoph Arenz<sup>5</sup>, Alexander Dietrich<sup>6,7</sup>, Thomas Gudermann<sup>6,7</sup>, Dieter Adam<sup>8</sup>, Michael Schaefer<sup>9</sup>, Joachim Jankowski<sup>4</sup>, Veit Flockerzi<sup>10</sup>, Rolf Nüsing<sup>11</sup>, Stefan Uhlig<sup>3,14</sup> and Wolfgang M. Kuebler<sup>1,12,13,14</sup>

<sup>1</sup>Institute for Physiology, Charité – Universitätsmedizin Berlin, Corporate Member of the Free University Berlin and the Humboldt University Berlin, Berlin, Germany. <sup>2</sup>Dept of Thoracic Surgery, Zhongshan Hospital Fudan University, Shanghai, China. <sup>3</sup>Institute of Pharmacology and Toxicology, Medical Faculty, RWTH Aachen University, Aachen, Germany. <sup>4</sup>Institute for Molecular and Cardiovascular Research, Medical Faculty, RWTH Aachen University, Aachen, Germany. <sup>5</sup>Institute for Chemistry, Humboldt University Berlin, Berlin, Germany. <sup>6</sup>Walther-Straub-Institute for Pharmacology and Toxicology, Ludwig-Maximilians University Munich, Munich, Germany. <sup>7</sup>Comprehensive Pneumology Center Munich (CPC-M), German Center for Lung Research, Munich, Germany. <sup>8</sup>Institute for Immunology, Christian-Albrechts University Kiel, Kiel, Germany. <sup>9</sup>Rudolf-Boehm-Institute of Pharmacology and Toxicology, University of Leipzig, Leipzig, Germany. <sup>10</sup>Institute for Experimental and Clinical Pharmacology and Toxicology, Saarland University, Homburg, Germany. <sup>11</sup>Dept of Clinical Pharmacology, Johann-Wolfgang-Goethe University, Frankfurt, Germany. <sup>12</sup>The Keenan Research Centre for Biomedical Science at St Michael's, Toronto, ON, Canada. <sup>13</sup>Depts of Surgery and Physiology, University of Toronto, Toronto, ON, Canada. <sup>14</sup>Stefan Uhlig and Wolfgang M. Kuebler contributed equally to this article as lead authors and supervised the work.

Correspondence: Wolfgang M. Kuebler ([wolfgang.kuebler@charite.de](mailto:wolfgang.kuebler@charite.de))

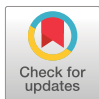

Shareable abstract (@ERSpublications)

EP<sub>3</sub> activation triggers pulmonary oedema via G<sub>i</sub>-dependent activation of PLC and subsequent tyrosine phosphorylation of TRPC6. In PAF-induced lung oedema this TRPC6 activation coincides with ASMase-dependent caveolar recruitment of TRPC6. <https://bit.ly/34P3d13>

**Cite this article as:** Jiang T, Samapati R, Klassen S, *et al.* Stimulation of the EP<sub>3</sub> receptor causes lung oedema by activation of TRPC6 in pulmonary endothelial cells. *Eur Respir J* 2022; 60: 2102635 [DOI: 10.1183/13993003.02635-2021].

This single-page version can be shared freely online.

Copyright ©The authors 2022.  
For reproduction rights and  
permissions contact  
[permissions@ersnet.org](mailto:permissions@ersnet.org)

Received: 4 Oct 2021  
Accepted: 17 Feb 2022

## Abstract

**Background** Prostaglandin E<sub>2</sub> (PGE<sub>2</sub>) increases pulmonary vascular permeability by activation of the PGE<sub>2</sub> receptor 3 (EP<sub>3</sub>), which may explain adverse pulmonary effects of the EP<sub>1</sub>/EP<sub>3</sub> receptor agonist sulprostone in patients. In addition, PGE<sub>2</sub> contributes to pulmonary oedema in response to platelet-activating factor (PAF). PAF increases endothelial permeability by recruiting the cation channel transient receptor potential canonical 6 (TRPC6) to endothelial caveolae via acid sphingomyelinase (ASMase). Yet, the roles of PGE<sub>2</sub> and EP<sub>3</sub> in this pathway are unknown. We hypothesised that EP<sub>3</sub> receptor activation may increase pulmonary vascular permeability by activation of TRPC6, and thus, synergise with ASMase-mediated TRPC6 recruitment in PAF-induced lung oedema.

**Methods** In isolated lungs, we measured increases in endothelial calcium ( $\Delta\text{Ca}^{2+}$ ) or lung weight ( $\Delta\text{weight}$ ), and endothelial caveolar TRPC6 abundance as well as phosphorylation.

**Results** PAF-induced  $\Delta\text{Ca}^{2+}$  and  $\Delta\text{weight}$  were attenuated in EP<sub>3</sub>-deficient mice. Sulprostone replicated PAF-induced  $\Delta\text{Ca}^{2+}$  and  $\Delta\text{weight}$  which were blocked by pharmacological/genetic inhibition of TRPC6, ASMase or Src-family kinases (SrcFK). PAF, but not sulprostone, increased TRPC6 abundance in endothelial caveolae. Immunoprecipitation revealed PAF- and sulprostone-induced tyrosine-phosphorylation of TRPC6 that was prevented by inhibition of phospholipase C (PLC) or SrcFK. PLC inhibition also blocked sulprostone-induced  $\Delta\text{Ca}^{2+}$  and  $\Delta\text{weight}$ , as did inhibition of SrcFK or inhibitory G-protein (G<sub>i</sub>) signalling.

**Conclusions** EP<sub>3</sub> activation triggers pulmonary oedema via G<sub>i</sub>-dependent activation of PLC and subsequent SrcFK-dependent tyrosine phosphorylation of TRPC6. In PAF-induced lung oedema, this TRPC6 activation coincides with ASMase-dependent caveolar recruitment of TRPC6, resulting in rapid endothelial Ca<sup>2+</sup> influx and barrier failure.
